# Supplementary material
Source: HighWire-hosted journal article supplement (https://ard.bmj.com/content/ard-2021-221926)
Supplement: inline-supplementary-material-2 [file inline-supplementary-material-2.xlsx]

## Sheet: Sheet1
Supplementary Table 1
Sex
	Sex
Group	Female	male	sum
CTX	22	10	32
HSCT	15	16	31
Sum	37	26	63
Age by group
Group	mean	sd
CTX	46.21	10.81
HSCT	44.06	10.03
Age of SSc
	mean	sd
	45.15	10.4
